# Supplementary material
Source: PubMed Central journal article supplement (PMC4765177)
Supplement: NIHMS721098-supplement-1.pdf [file NIHMS721098-supplement-1.pdf]

## Supplementary table

*Primers used in qPCR for determining G+/G- ratio and 16S rRNA pyrosequencing*

| Primers                                    | Sequence (5'→3')      |
|--------------------------------------------|-----------------------|
| Forward primer for Gram positive bacteria  | GAYGACGTCAARTCMTCATGC |
| Forward primer for Gram negative bacteria  | AYGACGTCAAGTCMTCATGG  |
| Reverse primer for all bacteria            | AGGAGGTGATCCAACCGCA   |
| Forward primer for 16S rRNA pyrosequencing | AYTGGGTDTAAGNG        |
| Reverse primer for 16S rRNA pyrosequencing | CCGTCAATTCMTTTRAGT    |

The sequencing primers amplify the variable regions V4 and V5 of the bacterial 16S rRNA. When used for PCR, appropriate adaptor sequences, synthesized according to 454 sequencing system instruction, as well as a barcode for each sample, were added at the 5' end of the primer sequence.
